# Supplementary material
Source: publisher figshare collection journal article supplement (https://sage.figshare.com/ndownloader/files/15482885)
Supplement: Supplementary file 1 [file 15482885]

Supplementary Material

Table S1. Description of stimuli along with the dominant name for each stimulus for each speaker group and the proportion of speakers producing that name. Data are ordered by U.S. native speaker dominant name and proportion.

| <b>object and means of support</b>                                    | <b>stim #</b> | <b>China learners<br/>lower prof.</b> |      | <b>China learners<br/>higher prof.</b> |      | <b>U.S. learners<br/>lower prof.</b> |      | <b>U.S. learners<br/>higher prof.</b> |      | <b>U.S.<br/>native speakers</b> |      |
|-----------------------------------------------------------------------|---------------|---------------------------------------|------|----------------------------------------|------|--------------------------------------|------|---------------------------------------|------|---------------------------------|------|
| (bouquet cautiously grasped in both hands)                            | 19            | walk                                  | 0.35 | hold                                   | 0.50 | walk                                 | 0.46 | hold                                  | 0.58 | carry                           | 0.75 |
| (plastic grocery bag dangling by side grasping handles with one hand) | 26            | carry                                 | 0.4  | carry                                  | 0.43 | walk                                 | 0.38 | carry                                 | 0.50 | carry                           | 0.75 |
| (handbag tucked under arm)                                            | 9             | walk                                  | 0.45 | carry                                  | 0.36 | walk                                 | 0.38 | carry                                 | 0.42 | carry                           | 0.65 |
| (knapsack on back)                                                    | 13            | take                                  | 0.30 | carry                                  | 0.57 | walk                                 | 0.46 | carry                                 | 0.50 | carry                           | 0.65 |
| (large handbag at waist height, grasped by one hand on handle)        | 20            | walk                                  | 0.45 | walk                                   | 0.36 | hold                                 | 0.31 | carry                                 | 0.42 | carry                           | 0.65 |
| (long tube balanced on shoulder)                                      | 21            | walk                                  | 0.40 | carry                                  | 0.57 | carry                                | 0.38 | hold                                  | 0.42 | carry                           | 0.65 |
| (plastic bottle grasped with one hand)                                | 17            | walk                                  | 0.35 | hold                                   | 0.36 | hold                                 | 0.46 | hold                                  | 0.75 | carry                           | 0.65 |
| (box lifted overhead with two hands)                                  | 12            | walk                                  | 0.35 | lift                                   | 0.36 | hold                                 | 0.46 | hold                                  | 0.58 | carry                           | 0.60 |
| (bowl of water in front of self, grasped with two hands)              | 25            | carry                                 | 0.3  | walk                                   | 0.29 | hold                                 | 0.38 | hold                                  | 0.58 | carry                           | 0.55 |
| (tote bag hanging over shoulder by strap)                             | 1             | carry                                 | 0.40 | carry                                  | 0.50 | walk                                 | 0.62 | walk                                  | 0.50 | carry                           | 0.55 |
| (plastic grocery bag dangling by side grasping handles with one hand) | 10            | take                                  | 0.30 | carry                                  | 0.29 | stand                                | 0.38 | carry                                 | 0.60 | carry                           | 0.50 |
| (tray balanced on palm at shoulder)                                   | 15            | walk                                  | 0.30 | carry                                  | 0.29 | walk                                 | 0.38 | hold                                  | 0.33 | carry                           | 0.40 |
| (plastic bottle grasped with one hand)                                | 18            | hold                                  | 0.45 | stand                                  | 0.36 | hold                                 | 0.38 | hold                                  | 0.83 | hold                            | 0.95 |

|                                                                |    |              |      |              |      |       |      |       |      |      |      |
|----------------------------------------------------------------|----|--------------|------|--------------|------|-------|------|-------|------|------|------|
| (bouquet cautiously grasped in both hands)                     | 14 | take         | 0.30 | hold         | 0.43 | hold  | 0.46 | hold  | 0.67 | hold | 0.85 |
| (bowl of water in front of self, grasped with two hands)       | 23 | <i>other</i> | 0.25 | stand        | 0.43 | hold  | 0.62 | hold  | 0.83 | hold | 0.85 |
| (handbag tucked under arm)                                     | 24 | stand        | 0.4  | <i>other</i> | 0.29 | hold  | 0.46 | hold  | 0.58 | hold | 0.75 |
| (large handbag at waist height, grasped by one hand on handle) | 16 | take         | 0.35 | carry        | 0.21 | hold  | 0.46 | carry | 0.33 | hold | 0.65 |
| (long tube balanced on shoulder)                               | 11 | take         | 0.25 | carry        | 0.36 | carry | 0.38 | hold  | 0.33 | hold | 0.65 |
| (arms around stuffed animal)                                   | 7  | hold         | 0.35 | hug          | 0.36 | hold  | 0.54 | hold  | 0.50 | hold | 0.55 |
| (box lifted overhead with two hands)                           | 3  | lift         | 0.45 | lift         | 0.43 | hold  | 0.62 | hold  | 0.67 | hold | 0.55 |
| (tote bag hanging over shoulder by strap)                      | 22 | stand        | 0.35 | stand        | 0.36 | carry | 0.38 | carry | 0.58 | hold | 0.55 |
| (tray balanced on palm at shoulder)                            | 5  | hold         | 0.40 | hold         | 0.64 | hold  | 0.46 | hold  | 0.75 | hold | 0.50 |
| (arms around stuffed animal)                                   | 4  | walk         | 0.25 | hold         | 0.43 | hold  | 0.54 | hold  | 0.58 | hold | 0.40 |

Note. *Other* indicates that a variety of names never dominant for any stimulus collectively outnumbered any single name for a stimulus.

Table S2. Data for the three stimuli eliminated from analyses due to a U.S. native speaker dominant name that was not *carry* or *hold*. Data are ordered by U.S. native speaker dominant name and proportion.

| object and means of support       | stim # | China learners |      | China learners |      | U.S. learners |      | U.S. learners |      | U.S. native speakers |      |
|-----------------------------------|--------|----------------|------|----------------|------|---------------|------|---------------|------|----------------------|------|
|                                   |        | lower prof.    |      | higher prof.   |      | lower prof.   |      | higher prof.  |      |                      |      |
| (one hand on wooden bowl on head) | 6      | walk           | 0.25 | <i>other</i>   | 0.43 | hold          | 0.46 | hold          | 0.33 | balance              | 0.6  |
| (one hand on wooden bowl on head) | 8      | stand          | 0.25 | stand          | 0.36 | hold          | 0.54 | stand         | 0.42 | balance              | 0.55 |
| (knapsack on back)                | 2      | carry          | 0.35 | stand          | 0.43 | stand         | 0.46 | <i>other</i>  | 0.50 | wear                 | 0.35 |

Note. *Other* indicates that a variety of names never dominant for any stimulus collectively outnumbered any single name for a stimulus.
